# Supplementary material for: Transcriptomopathies of pre- and post-symptomatic frontotemporal dementia-like mice with TDP-43 depletion in forebrain neurons
Source: PubMed Central journal article supplement (PMC6440020; doi:10.1186/s40478-019-0674-x), 2019-03-29
Supplement: 40478_2019_674_MOESM2_ESM.pdf [file 40478_2019_674_MOESM2_ESM.pdf]

**Supplemental Table 1. List of the chromosome numbers, donor positions, acceptors positions and gene names of the transcripts from which the individual circular RNAs change in the cortex of 3 month and 12 month-old TDP-43 cKO mice, but not Ctrl mice are listed.**

| ID                              | Strand | Gene       | CircRNA expression |       |           |       | Significance |           | Congate gene expression |           | Significance |           |
|---------------------------------|--------|------------|--------------------|-------|-----------|-------|--------------|-----------|-------------------------|-----------|--------------|-----------|
|                                 |        |            | 3 Months           |       | 12 Months |       | 3 Months     | 12 Months | 3 Months                | 12 Months | 3 Months     | 12 Months |
|                                 |        |            | DESeq              | edgeR | DESeq     | edgeR | p<0.05       | p<0.05    | log2 FC                 | log2 FC   | p<0.05       | p<0.05    |
| chr7:99935162 chr7:99955540     | -      | Rnf169     | 7.46               | 8.87  | 0.45      | 0.53  | ●            |           | 0.00                    | -0.75     |              | ●         |
| chr19:4792398 chr19:4794009     | -      | Gm21992    | 7.40               | 8.80  | -0.06     | 0.01  | ●            |           | 0.00                    | -0.75     |              | ●         |
| chr15:39616510 chr15:39566943   | +      | Rims2      | 7.25               | 8.62  | -0.14     | -0.06 | ●            |           | -0.31                   | -0.39     |              | ●         |
| chr2:68390914 chr2:68410141     | -      | Stk39      | 6.33               | 7.62  | -0.29     | -0.23 | ●            |           | -0.21                   | -0.30     |              | ●         |
| chr2:25965663 chr2:25966948     | -      | Camsap1    | 5.82               | 7.17  | -0.09     | -0.01 | ●            |           | -0.36                   | -0.36     |              | ●         |
| chr8:79136663 chr8:79118175     | +      | Zfp827     | 5.67               | 6.91  | -0.39     | -0.32 | ●            |           | -0.33                   | -0.40     |              | ●         |
| chr8:77344640 chr8:77365160     | -      | Arhgap10   | 5.65               | 6.93  | 0.00      | 0.00  | ●            |           | -0.05                   | 0.02      |              |           |
| chr6:84989325 chr6:85005036     | -      | Exoc6b     | 5.32               | 6.57  | 0.36      | 0.47  | ●            |           | -0.09                   | -0.27     |              |           |
| chr11:84195687 chr11:84193079   | +      | Acaca      | 4.96               | 6.17  | 0.37      | 0.45  | ●            |           | -0.20                   | -0.19     |              |           |
| chr12:99388361 chr12:99388917   | -      | Foxn3      | 4.87               | 6.06  | -2.09     | -3.98 | ●            |           | -0.20                   | 0.00      |              |           |
| chr2:37627435 chr2:37647285     | -      | Strbp      | 4.84               | 6.06  | 1.01      | 1.08  | ●            |           | 0.08                    | 0.02      |              |           |
| chr2:70750435 chr2:70786995     | -      | Ttk1       | 4.83               | 6.01  | -1.46     | -3.44 | ●            |           | 0.36                    | 0.24      |              |           |
| chr4:109083089 chr4:109087485   | -      | Osbpl9     | 4.69               | 5.95  | 0.00      | 0.00  | ●            |           | -0.20                   | -0.18     |              |           |
| chr17:42845326 chr17:42852528   | -      | Cd2ap      | 4.65               | 5.89  | 0.39      | 0.49  | ●            |           | -0.05                   | 0.00      |              |           |
| chr12:77332329 chr12:77323845   | +      | Fut8       | 4.34               | 5.62  | -0.05     | 0.00  | ●            |           | 0.17                    | 0.13      |              |           |
| chr12:100446860 chr12:100495440 | -      | Ttc7b      | 4.29               | 5.54  | 0.62      | 0.76  | ●            |           | 0.07                    | 0.03      |              |           |
| chr19:29753600 chr19:29755017   | -      | 30021J03F  | 4.28               | 5.50  | 0.67      | 0.78  | ●            |           | 0.10                    | -0.02     |              |           |
| chr3:116645366 chr3:116651499   | -      | 13191.Mfsc | 4.26               | 5.46  | 0.06      | 0.13  | ●            |           | -0.03                   | -0.22     |              |           |
| chr1:8554725 chr1:8624881       | -      | Sntg1      | 4.12               | 5.38  | -1.54     | -1.49 | ●            |           | -0.13                   | -0.34     |              |           |
| chr19:7026292 chr19:7032649     | -      | Stip1      | 4.11               | 5.29  | -0.19     | -0.10 | ●            |           | -0.10                   | -0.09     |              |           |
| chr4:129178241 chr4:129183717   | -      | S100bpb    | 4.07               | 5.29  | 0.34      | 0.41  | ●            |           | 0.09                    | 0.11      |              |           |
| chr3:103311513 chr3:103310309   | +      | Trim33     | 4.07               | 5.30  | -0.26     | -0.20 | ●            |           | -0.18                   | 0.00      |              |           |
| chr11:80227332 chr11:80223903   | +      | Rhot1      | 4.04               | 5.36  | -0.21     | -0.08 | ●            |           | -0.07                   | -0.08     |              |           |
| chr1:1186774 chr1:1199513       | -      | Uty        | 4.01               | 5.34  | 0.54      | 0.65  | ●            |           | 0.00                    | -0.21     |              |           |
| chr2:169886459 chr2:169883526   | +      | Tshz2      | 3.98               | 5.19  | -3.38     | -4.94 | ●            |           | -0.05                   | -0.24     |              |           |
| chr9:8658377 chr9:8634047       | +      | Trpc6      | -1.05              | -1.30 | -0.23     | -0.15 | ●            |           | -0.60                   | -0.56     | ●            | ●         |
| chr4:132673032 chr4:132656693   | +      | Eya3       | -3.94              | -5.52 | -0.16     | -0.08 | ●            |           | -0.12                   | -0.06     |              |           |
| chr17:25235182 chr17:25235627   | -      | Gnptg      | -4.00              | -5.61 | 0.25      | 0.30  | ●            |           | 0.00                    | -0.04     |              |           |
| chr18:77150098 chr18:77133091   | +      | Pias2      | -4.22              | -5.77 | 0.42      | 0.53  | ●            |           | 0.04                    | 0.03      |              |           |
| chr13:106812208 chr13:106848336 | -      | Ipo11      | -4.29              | -5.84 | -0.41     | -0.31 | ●            |           | 0.00                    | 0.00      |              |           |
| chr17:88463263 chr17:88462713   | +      | Foxn2      | -4.39              | -5.97 | 0.37      | 0.46  | ●            |           | -0.04                   | 0.03      |              |           |
| chr8:77382725 chr8:77413627     | -      | Arhgap10   | -4.60              | -6.16 | -0.63     | -0.56 | ●            |           | -0.16                   | -0.06     |              |           |
| chr15:81382980 chr15:81392322   | -      | St13       | -4.60              | -6.16 | -0.20     | -0.11 | ●            |           | -0.09                   | -0.11     |              |           |
| chr8:67904117 chr8:67908889     | -      | Psd3       | -4.72              | -6.27 | 0.40      | 0.48  | ●            |           | 0.00                    | 0.00      |              |           |
| chr2:140042094 chr2:140057499   | -      | Tasp1      | -5.00              | -6.55 | 0.49      | 0.59  | ●            |           | -0.06                   | -0.14     |              |           |
| chr15:41826052 chr15:41797474   | +      | Oxr1       | -5.22              | -6.79 | -0.61     | -0.51 | ●            |           | -0.27                   | -0.07     |              |           |
| chr7:141992300 chr7:141987751   | +      | Brsk2      | -6.00              | -7.61 | 0.05      | 0.11  | ●            |           | -0.22                   | -0.28     |              |           |
| chr7:99935162 chr7:99943105     | -      | Rnf169     | -6.29              | -6.98 | -0.47     | -0.46 | ●            |           | -0.22                   | -0.28     |              |           |
| chr9:96591950 chr9:96611499     | -      | Rasa2      | -7.32              | -9.06 | -0.21     | -0.13 | ●            |           | -0.21                   | -0.30     |              |           |
| chr9:32208265 chr9:32181842     | +      | Arhgap32   | 5.33               | 6.53  | 6.11      | 7.69  | ●            | ●         | -0.39                   | 0.00      | ●            |           |
| chr3:50417988 chr3:50438915     | -      | Slc7a11    | -3.95              | -5.52 | 5.06      | 6.56  | ●            | ●         | 0.44                    | 0.42      | ●            | ●         |
| chr19:57797503 chr19:57751630   | +      | Atrml1     | -5.58              | -7.17 | 6.29      | 7.88  | ●            | ●         | -0.22                   | -0.37     | ●            | ●         |
| chr9:77164765 chr9:77190737     | -      | Mlip       | 5.10               | 6.31  | -6.44     | -8.13 | ●            | ●         | -0.36                   | -0.71     |              | ●         |
| chr16:17373350 chr16:17389457   | -      | Pi4ka      | 6.23               | 7.50  | 1.07      | 1.15  | ●            | ●         | -0.11                   | -0.18     |              |           |
| chr13:45735115 chr13:45956575   | -      | Atxn1      | -5.64              | -7.23 | 6.39      | 8.00  | ●            | ●         | -0.05                   | -0.34     |              |           |
| chr17:74241905 chr17:74258505   | -      | Memo1      | 3.95               | 5.27  | -4.50     | -6.11 | ●            | ●         | 0.11                    | 0.00      |              |           |
| chr2:33260478 chr2:33324703     | -      | Ralgps1    | 6.11               | 7.40  | -6.39     | -8.09 | ●            | ●         | -0.18                   | -0.20     |              |           |
| chr9:59426123 chr9:59454469     | -      | Arih1      | 4.98               | 6.17  | -5.47     | -7.07 | ●            | ●         | -0.09                   | -0.01     |              |           |
| chr1:66801049 chr1:66802168     | -      | Kansl1     | 4.09               | 5.29  | 2.73      | 2.89  | ●            | ●         | 1.46                    | 0.00      |              |           |
| chr11:97531804 chr11:97535827   | -      | Scrn1      | 5.32               | 6.57  | 5.88      | 7.45  | ●            | ●         | 0.22                    | 0.25      |              |           |
| chr11:104423922 chr11:104426468 | -      | Kansl1     | -4.21              | -5.77 | -4.29     | -5.90 | ●            | ●         | -0.25                   | -0.05     |              |           |
| chr13:91642391 chr13:91524585   | +      | Ssbp2      | 4.17               | 5.38  | 5.12      | 6.60  | ●            | ●         | 0.55                    | -0.19     |              |           |
| chr14:12418005 chr14:12457829   | -      | Cadps      | -4.86              | -6.42 | -5.86     | -7.50 | ●            | ●         | -0.13                   | -0.13     |              |           |
| chr14:30484586 chr14:30482193   | +      | Dcp1a      | 1.78               | 1.54  | 1.68      | 1.79  | ●            | ●         | 0.26                    | 0.17      |              |           |
| chr16:11116795 chr16:11128703   | -      | Txndc11    | 4.75               | 5.95  | 6.08      | 7.66  | ●            | ●         | 0.00                    | -0.21     |              |           |
| chr16:17373350 chr16:17378514   | -      | Pi4ka      | 3.95               | 5.19  | 3.52      | 3.95  | ●            | ●         | -0.11                   | -0.18     |              |           |
| chr3:51299783 chr3:51326035     | -      | Elf2       | 4.05               | 5.37  | 5.61      | 7.14  | ●            | ●         | -0.34                   | -0.38     |              |           |
| chr4:117615241 chr4:117582600   | +      | Eri3       | -4.35              | -5.91 | -5.09     | -6.70 | ●            | ●         | -0.08                   | -0.14     |              |           |
| chr5:23540375 chr5:23565265     | -      | Srpk2      | 4.10               | 5.29  | 4.30      | 5.85  | ●            | ●         | -0.12                   | -0.13     |              |           |
| chr5:143707549 chr5:143686473   | +      | Cyth3      | 4.37               | 5.55  | 5.33      | 6.87  | ●            | ●         | 0.19                    | 0.08      |              |           |
| chr9:24462577 chr9:24485729     | -      | Dpy19l1    | -3.96              | -5.53 | -4.66     | -6.23 | ●            | ●         | -0.16                   | -0.20     |              |           |
| chr13:11750689 chr13:11769999   | -      | Ryr2       | 0.85               | 2.60  | 3.92      | 5.47  | ●            | ●         | -0.38                   | 0.00      | ●            |           |
| chr1:181109160 chr1:181123984   | -      | Nvl        | 2.45               | 2.36  | 2.16      | 2.30  | ●            | ●         | 0.77                    | 0.06      | ●            |           |
| chr5:120655129 chr5:120654806   | +      | Rasal1     | 2.35               | 4.02  | 2.28      | 2.42  | ●            | ●         | -0.39                   | -0.52     | ●            | ●         |
| chr6:140563648 chr6:140543720   | +      | Plekha5    | 0.40               | 0.20  | -3.90     | -5.43 | ●            | ●         | -0.47                   | -0.36     | ●            | ●         |
| chr8:86860426 chr8:86862110     | -      | N4bp1      | 1.22               | 0.97  | 1.41      | 1.52  | ●            | ●         | 0.59                    | 0.42      | ●            | ●         |
| chr15:82825231 chr15:82857284   | -      | Tcf20      | 0.00               | 0.00  | -5.20     | -6.78 | ●            | ●         | -0.44                   | -0.40     | ●            | ●         |
| chr1:140450304 chr1:140362949   | +      | Kcnt2      | -1.00              | -1.26 | -0.69     | -0.62 | ●            | ●         | -0.54                   | -0.89     | ●            | ●         |
| chr1:140484233 chr1:140362949   | +      | Kcnt2      | 0.00               | 0.00  | 4.26      | 5.84  | ●            | ●         | -0.54                   | -0.89     | ●            | ●         |
| chr8:77384751 chr8:77413627     | -      | Arhgap10   | 3.35               | 4.72  | -4.08     | -5.65 | ●            | ●         | 0.00                    | -0.75     | ●            | ●         |
| chr18:33129833 chr18:33077993   | +      | Camk4      | -0.44              | -0.67 | 5.21      | 6.70  | ●            | ●         | -0.24                   | -0.73     | ●            | ●         |
| chr8:77310731 chr8:77358634     | -      | Arhgap10   | -3.85              | -5.43 | 4.62      | 6.14  | ●            | ●         | 0.00                    | -0.75     | ●            | ●         |
| chr8:77310731 chr8:77365160     | -      | Arhgap10   | -0.86              | -1.11 | 5.29      | 6.83  | ●            | ●         | 0.00                    | -0.75     | ●            | ●         |
| chr3:89007877 chr3:89001773     | +      | Ash11      | 0.00               | 0.00  | -5.25     | -6.82 | ●            | ●         | -0.25                   | -0.34     | ●            | ●         |

|                 |                 |   |          |       |       |       |        |   |       |       |   |
|-----------------|-----------------|---|----------|-------|-------|-------|--------|---|-------|-------|---|
| chr5:73534697   | chr5:73520116   | + | Dcun1d4  | 0.13  | -0.08 | 4.25  | 6.35   | ● | -0.26 | -0.36 | ● |
| chr7:14578736   | chr7:14609339   | - | Nlrp5-ps | 0.00  | 0.00  | -5.30 | -6.92  | ● | 0.00  | -1.07 | ● |
| chr9:77164765   | chr9:77217048   | - | Mlip     | -0.85 | -1.11 | 6.56  | 8.22   | ● | -0.36 | -0.71 | ● |
| chr12:3648389   | chr12:3617606   | + | Dtnb     | 0.13  | -0.11 | -8.83 | -10.83 | ● | -0.25 | -0.43 | ● |
| chr12:3686862   | chr12:3617606   | + | Dtnb     | -0.28 | -0.55 | -6.59 | -8.30  | ● | -0.25 | -0.43 | ● |
| chr19:57777945  | chr19:57751630  | + | Atml1    | 0.03  | -0.21 | -6.64 | -8.36  | ● | -0.22 | -0.37 | ● |
| chr5:73534697   | chr5:73510886   | + | Dcun1d4  | -0.80 | -1.04 | -6.81 | -8.54  | ● | -0.26 | -0.36 | ● |
| chr5:73544155   | chr5:73520116   | + | Dcun1d4  | -0.32 | -0.53 | -4.76 | -6.33  | ● | -0.26 | -0.36 | ● |
| chr7:23438059   | chr7:14609339   | - | Nlrp5-ps | 0.00  | 0.00  | 5.77  | 7.31   | ● | 0.00  | -1.07 | ● |
| chr7:97894013   | chr7:97883472   | + | Pak1     | 3.84  | 5.17  | -4.35 | -5.96  | ● | -0.29 | -0.36 | ● |
| chr13:35816575  | chr13:35790101  | + | Cdyl     | -3.82 | -5.43 | 4.99  | 6.51   | ● | -0.30 | -0.44 | ● |
| chr10:127454756 | chr10:127452692 | + | R3hdm2   | 0.00  | 0.00  | 3.97  | 5.48   | ● | -0.20 | -0.43 | ● |
| chr12:38190134  | chr12:38147503  | + | Dgkb     | -1.00 | -3.24 | -3.80 | -5.41  | ● | -0.14 | -0.37 | ● |
| chr15:39517871  | chr15:39452224  | + | Rims2    | 2.04  | 4.21  | -3.94 | -5.50  | ● | -0.21 | -0.30 | ● |
| chr2:24631899   | chr2:24651218   | - | Cacna1b  | 2.08  | 3.78  | 4.09  | 5.63   | ● | -0.13 | 0.40  | ● |
| chr2:68307041   | chr2:68359034   | - | Stk39    | 1.07  | 0.87  | 4.98  | 6.46   | ● | -0.33 | -0.40 | ● |
| chr12:3718489   | chr12:3617606   | + | Dtnb     | 0.42  | 1.82  | -2.85 | -2.91  | ● | -0.25 | -0.43 | ● |
| chr1:8624779    | chr1:8682029    | - | Sntg1    | -0.08 | -0.35 | 3.83  | 5.38   | ● | -0.05 | -0.24 | ● |
| chr1:53256629   | chr1:53290423   | - | Pms1     | 0.00  | 0.00  | -4.04 | -5.64  | ● | -0.21 | -0.41 | ● |
| chr10:9825370   | chr10:9838160   | - | Stxbp5   | 1.57  | 3.72  | 3.15  | 3.50   | ● | -0.14 | -0.10 | ● |
| chr10:43413547  | chr10:43393871  | + | Pdss2    | -0.60 | -0.84 | -4.64 | -6.18  | ● | -0.17 | -0.20 | ● |
| chr10:90163304  | chr10:90069468  | + | Anks1b   | -2.10 | -4.16 | -3.91 | -5.50  | ● | -0.26 | -0.12 | ● |
| chr12:24939348  | chr12:24878191  | + | Mboat2   | 0.00  | 0.00  | 4.30  | 5.74   | ● | -0.22 | -0.25 | ● |
| chr12:50419853  | chr12:50428234  | - | Prkd1    | 1.09  | 3.11  | 3.86  | 5.46   | ● | 0.04  | 0.02  | ● |
| chr12:73219142  | chr12:73179205  | + | Mnat1    | 0.00  | 0.00  | 4.09  | 5.58   | ● | 0.02  | -0.09 | ● |
| chr13:59495333  | chr13:59504310  | - | Agtpbp1  | -0.36 | -0.68 | -3.84 | -5.35  | ● | -0.26 | -0.26 | ● |
| chr14:12411554  | chr14:12440915  | - | Cadps    | -0.39 | -0.62 | 4.09  | 5.64   | ● | -0.13 | -0.13 | ● |
| chr14:12411554  | chr14:12457829  | - | Cadps    | 2.96  | 4.41  | 4.25  | 5.73   | ● | -0.13 | -0.13 | ● |
| chr14:28141381  | chr14:28029434  | + | Erc2     | 0.85  | 2.60  | 4.41  | 5.88   | ● | -0.17 | 0.00  | ● |
| chr14:28141381  | chr14:28040343  | + | Erc2     | -0.32 | -0.55 | -1.75 | -1.69  | ● | -0.17 | 0.00  | ● |
| chr14:57856610  | chr14:57878459  | - | Zdhhc20  | 1.91  | 3.77  | -4.07 | -5.65  | ● | 0.11  | -0.01 | ● |
| chr15:69049461  | chr15:69013358  | + | Khdrbs3  | 0.00  | 0.00  | -3.88 | -5.50  | ● | -0.16 | -0.25 | ● |
| chr16:17381801  | chr16:17389457  | - | Pi4ka    | 3.71  | 4.98  | 2.08  | 2.19   | ● | -0.11 | -0.18 | ● |
| chr16:37236230  | chr16:37291063  | - | Stxbp5l  | 3.25  | 4.57  | 4.59  | 6.08   | ● | -0.02 | -0.07 | ● |
| chr18:23597558  | chr18:23583084  | + | Dtna     | 0.86  | 0.61  | 4.59  | 6.05   | ● | -0.10 | -0.09 | ● |
| chr19:16759587  | chr19:16766540  | - | Vps13a   | 1.46  | 3.49  | 4.14  | 5.63   | ● | -0.21 | -0.22 | ● |
| chr2:25937946   | chr2:25941469   | - | Ramsap1  | 0.00  | 0.00  | 4.01  | 5.48   | ● | -0.16 | -0.06 | ● |
| chr2:37509078   | chr2:37469377   | + | Rabgap1  | 0.57  | 0.35  | 3.88  | 5.38   | ● | 0.01  | 0.02  | ● |
| chr2:61627839   | chr2:61613651   | + | Tank     | 1.95  | 4.00  | 4.09  | 5.65   | ● | 0.00  | 0.02  | ● |
| chr2:91825352   | chr2:91805024   | + | Ambral   | -0.20 | -0.42 | -4.97 | -6.53  | ● | -0.02 | -0.12 | ● |
| chr2:94371737   | chr2:94378858   | - | Ttc17    | 3.30  | 4.72  | 4.99  | 6.52   | ● | 0.14  | 0.11  | ● |
| chr2:131287597  | chr2:131273911  | + | Pank2    | -0.23 | -0.49 | -4.26 | -5.85  | ● | 0.01  | -0.12 | ● |
| chr2:139996073  | chr2:140057499  | - | Tasp1    | -0.61 | -0.89 | -5.28 | -6.90  | ● | -0.13 | -0.34 | ● |
| chr3:88908789   | chr3:88901578   | + | Gon4l    | 1.74  | 3.77  | 3.87  | 5.46   | ● | 0.08  | 0.03  | ● |
| chr3:129996681  | chr3:130005096  | - | Sec24b   | 3.74  | 4.98  | 4.39  | 5.84   | ● | -0.02 | 0.06  | ● |
| chr3:158127215  | chr3:158148699  | - | Lrrc7    | 2.70  | 4.23  | 4.01  | 5.51   | ● | -0.03 | -0.15 | ● |
| chr4:41189286   | chr4:41183245   | + | Ube2r2   | 3.81  | 5.09  | 4.73  | 6.28   | ● | 0.04  | -0.14 | ● |
| chr4:123444835  | chr4:123456749  | - | Macf1    | 2.30  | 4.02  | 3.97  | 5.48   | ● | -0.11 | -0.05 | ● |
| chr4:126453558  | chr4:126454424  | - | Ago1     | 1.47  | 3.48  | 3.95  | 5.39   | ● | 0.06  | -0.15 | ● |
| chr5:53199901   | chr5:53200471   | - | Sel1l3   | 1.35  | 1.12  | 1.79  | 1.89   | ● | 0.14  | -0.19 | ● |
| chr5:90974415   | chr5:90946790   | + | Mthfd2l  | 0.89  | 0.69  | 4.86  | 6.41   | ● | -0.14 | -0.22 | ● |
| chr5:110753804  | chr5:110756766  | - | Ep400    | 0.00  | 0.00  | -4.12 | -5.66  | ● | -0.10 | -0.12 | ● |
| chr6:36894776   | chr6:36975247   | - | Dgki     | 0.00  | 0.00  | -4.14 | -5.66  | ● | -0.16 | -0.17 | ● |
| chr6:37048120   | chr6:37087694   | - | Dgki     | -0.74 | -1.00 | -4.05 | -5.91  | ● | -0.16 | -0.17 | ● |
| chr7:46515668   | chr7:46635556   | - | Sergef   | 0.83  | 0.66  | -3.83 | -5.37  | ● | -0.16 | -0.32 | ● |
| chr7:132771578  | chr7:132779385  | - | Fam53b   | 0.44  | 0.19  | 1.34  | 1.43   | ● | 0.00  | 0.00  | ● |
| chr7:137453614  | chr7:137444979  | + | Glr3     | 3.40  | 4.75  | -3.80 | -5.42  | ● | -0.11 | 0.00  | ● |
| chr8:46818908   | chr8:46793493   | + | Irf2     | -0.16 | -0.36 | 4.04  | 5.49   | ● | -0.13 | -0.36 | ● |
| chr8:88723212   | chr8:88702305   | + | Cyld     | -0.28 | -0.49 | 4.06  | 5.57   | ● | -0.07 | -0.07 | ● |
| chr9:90103655   | chr9:90110172   | - | Morf4l1  | 0.00  | 0.00  | 4.45  | 5.95   | ● | -0.05 | -0.26 | ● |
| chr9:96340202   | chr9:96345893   | - | Atp1b3   | 3.63  | 4.97  | 4.24  | 5.73   | ● | 0.18  | -0.09 | ● |
| chr10:9778021   | chr10:9800068   | - | Stxbp5   | 0.00  | 0.00  | -4.63 | -6.18  | ● | -0.14 | -0.10 | ● |
| chr10:12436281  | chr10:12455564  | - | Utrn     | -1.18 | -1.42 | 5.26  | 6.80   | ● | -0.10 | -0.18 | ● |
| chr10:90923602  | chr10:90895099  | + | Anks1b   | -0.01 | -0.26 | 5.13  | 6.69   | ● | -0.26 | -0.12 | ● |
| chr11:104350487 | chr11:104378826 | - | Kansl1   | -0.35 | -0.58 | 5.86  | 7.44   | ● | -0.25 | -0.05 | ● |
| chr12:24924294  | chr12:24878191  | + | Mboat2   | -0.75 | -0.98 | 7.44  | 9.17   | ● | -0.22 | -0.25 | ● |
| chr12:24934622  | chr12:24878191  | + | Mboat2   | -0.40 | -0.66 | 6.28  | 7.86   | ● | -0.22 | -0.25 | ● |
| chr12:81480931  | chr12:81510965  | - | Gm20498  | 0.00  | 0.00  | -4.44 | -5.97  | ● | 0.00  | 0.00  | ● |
| chr12:111618383 | chr12:111592577 | + | Mark3    | 0.31  | 0.05  | 4.85  | 6.32   | ● | -0.06 | -0.04 | ● |
| chr12:113629994 | chr17:66053091  | - | Ankrd12  | 0.00  | 0.00  | -8.60 | -10.57 | ● | -0.11 | -0.18 | ● |
| chr14:56748835  | chr14:56772006  | - | Pspc1    | -0.24 | -0.45 | 5.38  | 6.91   | ● | -0.13 | -0.13 | ● |
| chr18:63825238  | chr18:63791796  | + | Wdr7     | 0.00  | 0.00  | -5.44 | -7.04  | ● | -0.09 | -0.02 | ● |
| chr19:14516359  | chr19:14564451  | - | Tle4     | -0.66 | -0.95 | 5.19  | 6.75   | ● | -0.14 | -0.07 | ● |
| chr2:14026906   | chr2:14045255   | - | Hacd1    | 0.00  | 0.00  | -5.00 | -6.60  | ● | 0.00  | 0.00  | ● |
| chr3:55853771   | chr3:55891674   | - | Nbea     | 3.35  | 4.72  | -4.44 | -5.99  | ● | -0.15 | -0.13 | ● |
| chr6:31433131   | chr6:31418931   | + | Mkin1    | 0.10  | -0.15 | 5.60  | 7.12   | ● | -0.11 | -0.08 | ● |
| chr6:38470222   | chr6:38461475   | + | Ubn2     | -0.08 | -0.35 | 5.02  | 6.55   | ● | -0.26 | -0.11 | ● |
| chr7:81893799   | chr7:81905636   | - | Hdgfrp3  | 0.15  | -0.09 | 7.83  | 9.60   | ● | 0.10  | -0.08 | ● |
| chr9:24473774   | chr9:24485729   | - | Dpy19l1  | 0.00  | 0.00  | -5.82 | -7.46  | ● | -0.16 | -0.20 | ● |
| chr9:59843138   | chr9:59801914   | + | Myo9a    | -1.02 | -1.26 | 5.43  | 7.01   | ● | -0.09 | -0.21 | ● |
| chr9:100757786  | chr9:100705153  | + | Stag1    | -0.20 | -0.45 | 5.01  | 6.52   | ● | -0.14 | -0.29 | ● |

|                                 |   |         |       |       |       |       |  |   |       |       |  |
|---------------------------------|---|---------|-------|-------|-------|-------|--|---|-------|-------|--|
| chr9:100738142_chr9:100663250   | + | Stag1   | 3.70  | 4.97  | -5.00 | -6.61 |  | ● | -0.14 | -0.29 |  |
| chr1:13221307_chr1:13286025     | - | Ncoa2   | -0.54 | -0.82 | -6.62 | -8.33 |  | ● | -0.28 | -0.13 |  |
| chr1:190871592_chr1:190899571   | - | Rps6kc1 | 0.61  | 0.36  | -7.37 | -9.16 |  | ● | -0.21 | -0.30 |  |
| chr10:18625148_chr10:18630926   | - | Arfgef3 | 0.00  | 0.00  | 4.79  | 6.26  |  | ● | 0.00  | 0.00  |  |
| chr10:89112791_chr10:89125224   | - | Ano4    | 1.65  | 1.46  | -4.55 | -6.12 |  | ● | -0.06 | -0.05 |  |
| chr12:51621780_chr12:51661713   | - | Stm3    | 0.26  | 0.01  | -4.45 | -5.99 |  | ● | 0.03  | -0.06 |  |
| chr12:55782782_chr12:55795776   | - | Ralgap1 | 0.00  | 0.00  | 4.74  | 6.20  |  | ● | -0.14 | -0.18 |  |
| chr12:103149081_chr12:103146302 | + | Unc79   | 0.00  | 0.00  | 3.00  | 3.23  |  | ● | -0.18 | -0.24 |  |
| chr13:93349297_chr13:93341756   | + | Homer1  | 0.93  | 0.72  | -5.20 | -6.80 |  | ● | -0.03 | -0.27 |  |
| chr15:4059996_chr15:4047465     | + | Oxct1   | -0.64 | -0.89 | -5.98 | -7.65 |  | ● | -0.07 | -0.11 |  |
| chr15:95374728_chr15:95385156   | - | Nell2   | 0.36  | 0.14  | -5.16 | -6.78 |  | ● | -0.14 | -0.15 |  |
| chr16:20657609_chr16:20656543   | + | Psm2    | 0.00  | 0.00  | 5.55  | 7.07  |  | ● | -0.06 | -0.04 |  |
| chr16:33457001_chr16:33421321   | + | Zfp148  | -0.73 | -0.99 | -4.88 | -6.45 |  | ● | 0.01  | -0.09 |  |
| chr16:94403368_chr16:94383912   | + | Ttc3    | -0.12 | -0.36 | -7.35 | -9.15 |  | ● | -0.16 | -0.13 |  |
| chr2:156254310_chr2:156223335   | + | Phf20   | 0.00  | 0.00  | 4.63  | 6.09  |  | ● | -0.19 | -0.18 |  |
| chr3:133348190_chr3:133320936   | + | Ppa2    | 0.22  | 0.01  | -4.92 | -6.49 |  | ● | -0.26 | -0.30 |  |
| chr4:9583812_chr4:9610938       | - | Asph    | -0.10 | -0.36 | -4.56 | -6.13 |  | ● | -0.10 | -0.16 |  |
| chr4:150477468_chr4:150439343   | + | Rere    | -0.16 | -0.39 | -5.78 | -7.42 |  | ● | 0.00  | -0.12 |  |
| chr4:150534945_chr4:150500003   | + | Rere    | 0.75  | 0.53  | -3.90 | -5.43 |  | ● | 0.00  | -0.12 |  |
| chr5:20569354_chr5:20543585     | + | Magi2   | 0.66  | 0.44  | -5.36 | -6.96 |  | ● | -0.09 | -0.05 |  |
| chr5:71006107_chr5:71034797     | - | Gabra2  | 0.00  | 0.00  | 4.78  | 6.31  |  | ● | -0.15 | 0.25  |  |
| chr5:150604177_chr5:150608440   | - | N4bp2l2 | -0.39 | -0.62 | -5.85 | -7.48 |  | ● | -0.09 | -0.08 |  |
| chr6:31459067_chr6:31418931     | + | Mkln1   | 0.00  | 0.00  | 4.76  | 6.26  |  | ● | -0.11 | -0.08 |  |
| chr8:18689059_chr8:18641565     | + | Mcph1   | 0.00  | -0.26 | -5.54 | -7.17 |  | ● | 0.29  | 0.09  |  |
| chr8:22545600_chr8:22535019     | + | Slc20a2 | -0.33 | -0.58 | -4.26 | -5.85 |  | ● | 0.05  | -0.04 |  |
| chr9:96582743_chr9:96611499     | - | Rasa2   | 0.00  | 0.00  | 4.84  | 6.31  |  | ● | 0.00  | -0.21 |  |
| chr9:100803354_chr9:100776756   | + | Stag1   | -0.68 | -0.93 | -4.74 | -6.34 |  | ● | -0.14 | -0.29 |  |

FC, fold change. DESeq, differential gene expression analysis based on the negative binomial distribution. edgeR, differential expression analysis of digital gene expression data.
