# Supplementary material for: Transcriptomopathies of pre- and post-symptomatic frontotemporal dementia-like mice with TDP-43 depletion in forebrain neurons
Source: Springer Nature journal article supplement (doi:10.1186/s40478-019-0674-x), 2019-03-29
Supplement: MOESM3 [file 25666668]

Supplemental Table 2. Changes of the mRNA levels of social behaviour-related genes in the cortex of TDP-43 cKO mice relative to Ctrl mice.

| Gene symbol | Name                                                                            | Log <sub>2</sub> (TDP-43 cKO/ Ctrl) |           | Significant (q<0.05) |           | Anxiety-like behaviour | Social behaviour defect |
|-------------|---------------------------------------------------------------------------------|-------------------------------------|-----------|----------------------|-----------|------------------------|-------------------------|
|             |                                                                                 | 3 Months                            | 12 months | 3 Months             | 12 months |                        |                         |
| Slc6a3      | solute carrier family 6 member 3                                                | 2.18824                             | 0.796075  | ●                    |           | Perona et al. 2008     |                         |
| Egr1        | early growth response 1                                                         | -0.420573                           | -0.904261 |                      | ●         | Ko et al. 2005         |                         |
| Fos         | FBJ osteosarcoma oncogene                                                       | -0.765909                           | -0.839921 |                      | ●         | Blake et al. 2017      |                         |
| Camk4       | calcium/calmodulin-dependent protein kinase IV                                  | -0.244258                           | -0.725314 |                      | ●         | Shum et al. 2005       |                         |
| Rims1       | regulating synaptic membrane exocytosis 1                                       | -0.421464                           | -0.725084 |                      | ●         |                        | Blundell et al. 2010    |
| Ephb6       | Eph receptor B6                                                                 | -0.368624                           | -0.628178 |                      | ●         |                        | Bianco et al. 2007      |
| Camk2a      | calcium/calmodulin-dependent protein kinase II alpha                            | -0.496747                           | -0.603486 |                      | ●         | Hagihara et al. 2016   |                         |
| Rorb        | RAR-related orphan receptor beta                                                | -0.341338                           | -0.600719 |                      | ●         | Masana et al. 2007     |                         |
| Adcy1       | adenylate cyclase 1                                                             | -0.254744                           | -0.588347 |                      | ●         |                        | Blake et al. 2017       |
| Cadps2      | Ca <sup>2+</sup> -dependent activator protein for secretion 2                   | -0.534627                           | -0.557333 |                      | ●         |                        | Sadakata et al. 2007    |
| Dlgap3      | discs, large (Drosophila) homolog-associated protein 3                          | -0.428386                           | -0.518075 |                      | ●         | Welch et al. 2007      |                         |
| Snap25      | synaptosomal-associated protein 25                                              | -0.434212                           | -0.503622 |                      | ●         | Kataoka et al. 2011    |                         |
| Cplx2       | complexin 2                                                                     | -0.262926                           | -0.502105 |                      | ●         |                        | Glynn et al. 2010       |
| Ppp3r1      | protein phosphatase 3, regulatory subunit B, alpha isoform (calcineurin B, type | -0.251026                           | -0.477824 |                      | ●         |                        | Miyakawa et al. 2003    |
| Atp1a1      | ATPase, Na <sup>+</sup> /K <sup>+</sup> transporting, alpha 1 polypeptide       | -0.330546                           | -0.435031 |                      | ●         | Blake et al. 2017      |                         |
| Irs4        | insulin receptor substrate 4                                                    | 0.220604                            | 1.78847   |                      | ●         |                        | Xu et al. 2012          |
| Oxt         | oxytocin/neurophysin I prepropeptide                                            | 1.11135                             | 2.9496    |                      | ●         |                        | Ferguson et al. 2001    |
